# Supplementary material for: Long-Term Survival of Virulent Tularemia Pathogens outside a Host in Conditions That Mimic Natural Aquatic Environments
Source: PubMed Central journal article supplement (PMC8104992; doi:10.1128/aem.02713-20), 2021-02-26
Supplement: AEM.02713-20-s0001.pdf [file AEM.02713-20-s0001.pdf]

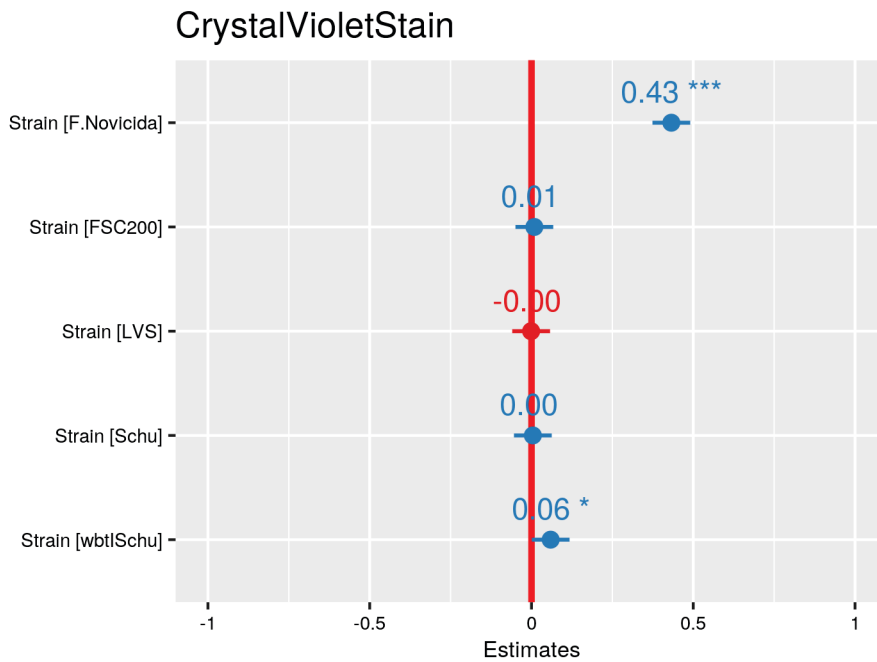

1

2 **Supplementary Figure 1.** Plot of the coefficient estimates of biofilm formation from the Crystal  
 3 Violet stain assay. The strain effect on the Crystal Violet stain assay by *Francisella* spp. strains (*F.*  
 4 *novicida* U112, FSC200, LVS, Schu S4 and Schu S4  $\Delta$ *wbtI* mutant) is calculated via comparison to  
 5 the negative control (saline solution, 0.9% NaCl). Point estimates (dots) for each strain are highlighted  
 6 in the figure together with 95% confidence interval (lines). Blue correspond to negative point  
 7 estimates and red corresponds to positive point estimate values. \* Significance value  $p = 0,05$ . \*\*\*  
 8 Significance value  $p = 0,001$ .
